# Supplementary material
Source: publisher figshare collection journal article supplement (https://geolsoc.figshare.com/ndownloader/files/26880126)
Supplement: Supplementary file 1 [file 26880126]

## Sheet: List of Samples and details
Sample ID	Period	Stage	Well	Depth (Ft'/m)	Cuttings/Core	Analysis type	Geographical X	Geographical Y
FB4	Cretaceous	Valanginian - Barremian	56/26-2	1220' - 1380'	Drill cuttings	Zr	50.0071	-9.89785
GS1	Jurassic	Callovian-Bathonian	62/07-1	10200' - 10350'	Drill cuttings	Zr	49.6673	-11.763
NC10	Jurassic	Kimmeridgian	50_03_02	4068'	Drill cuttings	Zr,HM	51.8893	-6.52916
NC11	Jurassic	Kimmeridgian	50_03_02	4068'	Core	HM	51.8893	-6.52916
NC13	Jurassic	Oxfordian	50_10_01	3260'	Drill cuttings	HM	51.7613	-6.74742
NC14	Jurassic	Oxfordian	50_10_01	3710'	Drill cuttings	HM	51.7613	-6.74742
NC15	Jurassic	Oxfordian	50_03_02	3770'	Drill cuttings	HM	51.8893	-6.52916
NC16	Jurassic	Oxfordian	50_03_02	5750'	Drill cuttings	HM	51.8893	-6.52916
NC17	Cretaceous	Albian	49/09-02	2460' - 2496'	Core 1	Zr, WM	51.684	-7.34609
NC18	Cretaceous	Berriasian - Hauterivan	48/18-01	850 m - 1160 m	Drill cuttings	Zr	51.425	-8.42268
NC19	Cretaceous	Aptian - Berremian	48/24-04	3276' - 3323.2'	Core 1	Zr, WM	51.3314	-8.29637
NC20	Cretaceous	Hauterivian	48/28-01	4600' - 5420'	Drill cuttings	Zr	51.1647	-8.46289
NC22	Cretaceous	Cimmerian	50_07_01	1480'	Drill cuttings	Zr, Ap, HM	51.7613	-6.74742
NC23	Cretaceous	Purbech	50_03_02	1540'	Drill cuttings	HM	51.8893	-6.52916
NC24	Cretaceous	Purbeck	50_03_01	1370'	Drill cuttings	HM	51.8969	-6.53608
NC25	Cretaceous	Purbech	50_03_02	2410'	Drill cuttings	HM	51.8893	-6.52916
NC26	Cretaceous	Berriasian - Hauterivan	56/22-1	3500' - 3846'	Drill cuttings	Zr	50.1857	-9.63613
NC27	Cretaceous	Valangian	56/15-1	3700'-3800'	Drill cuttings	WM	50.5447	-9.19745
NC6	Jurassic	Oxfordian - Kimmeridgian	49/15-01	3630' - 4100'	Drill cuttings	Zr	51.6587	-7.05978
NC7	Jurassic	Kimmeridgian	49/09-03	7854.5' - 7876.92'	Core 2	Zr, WM	51.684	-7.34606
NC8	Jurassic	Upper Jurassic	49/10-01	6246' - 6282'	Core 1	Zr	51.6848	-7.17654
NC9	Jurassic	Oxfordian - Kimmeridgian	50_03_01	2420'	Drill cuttings	Zr, HM	51.8969	-6.53608
SC1	Cretaceous	Berriasian - Hauterivan	58/03-01	3258' - 3910'	Drill cuttings	Zr	50.892	-7.58578
SG10	Jurassic	Oxfordian	107_16_1	2300'	Drill cuttings	HM	52.3693	-4.80972
SG11	Jurassic	Oxfordian	103_01_02	9350'	Drill cuttings	HM	51.9796	-5.89757
SG12	Jurassic	Bathonian	42_21_1	1290'	Drill cuttings	HM	52.1885	-5.98346
SG13	Jurassic	Bathonian	103_01_01	7910'	Drill cuttings	HM	51.9796	-5.89757
SG15	Jurassic	Aalenian	107_21_1	6100'	Drill cuttings	HM	52.3693	-4.80972
SG16	Cretaceous	Cimmerian	106_28_1	3020'	Drill cuttings	Zr, Ap, HM	52.0327	-5.59572
SG5	Jurassic	Callovian	107_16_1	6190'	Core	Zr, Ap, HM	52.3693	-4.80972
SG7	Jurassic	Kimmeridgian	107_16_1	1520'	Drill cuttings	HM	52.3693	-4.80972
SG8	Jurassic	Oxfordian	103_01_01	7080'	Drill cuttings	HM	51.9796	-5.89757
SG9	Jurassic	Oxfordian	103_01_01	7300'	Drill cuttings	HM	51.9796	-5.89757
Zr=Zircon	Ap=Apatite	HM=Heavy Mineral analysis
